# Supplementary material for: Association between prediabetes and risk of cardiovascular disease and all cause mortality: systematic review and meta-analysis
Source: PubMed Central journal article supplement — BMJ. 2016 Nov 23;355:i5953. doi: 10.1136/bmj.i5953 (PMC5121106; doi:10.1136/bmj.i5953), 2016-11-23
Supplement: huay034601.ww1_default.pdf [file huay034601.ww1_default.pdf]

## Appendix 1: Literature search strategy for all the databases

### 1. Search strategy for Pubmed

- #1** (((("Blood Glucose"[Mesh]) OR "Glucose Intolerance"[Mesh]) OR "Prediabetic State"[Mesh]) OR "Hyperglycemia"[Mesh] ) OR "Hemoglobin A, Glycosylated"
- #2** (((((((("Blood Glucose"[Text Word]) OR "Glucose Intolerance"[Text Word]) OR "Prediabetic State"[Text Word]) OR Hyperglycemia[Text Word]) OR "impaired fasting glucose"[Text Word]) OR "impaired glucose tolerance"[Text Word]) OR "pre-diabetes"[Text Word]) OR prediabetes[Text Word]) OR "borderline diabetes"[Text Word]) OR "higher risk of diabetes "[Text Word]) OR " high risk of diabetes"[Text Word]) OR hemoglobin A<sub>1c</sub> [Text Word]) OR HbA<sub>1c</sub>
- #3** #1 OR #2
- #4** (((("Cardiovascular Diseases"[Mesh] ) OR "Cerebrovascular Disorders"[Mesh] ) OR "Mortality"[Mesh]) OR "Death"[Mesh]) OR "Fatal Outcome"[Mesh]
- #5** (((((((("cardiovascular disease"[Text Word]) OR "cardiocerebrovascular disease"[Text Word]) OR "coronary artery disease"[Text Word]) OR "coronary heart disease"[Text Word]) OR "ischemic heart disease"[Text Word]) OR "myocardial infarction"[Text Word]) OR "cardiovascular events"[Text Word]) OR "cerebrovascular disease"[Text Word]) OR "stroke"[Text Word]) OR "cerebral infarction"[Text Word]) OR Mortality[Text Word]) OR fatal[Text Word]) OR death[Text Word]
- #6** #4 OR #5
- #7** #3 AND #6
- #8** animals[MeSH Terms]

**#9** humans[MeSH Terms]

**#10** #8 NOT #9

**#11** #7 NOT #10

**#12** ("Risk"[Mesh]) OR risk[Text Word]

**#13** #11 AND #12

**#14** ((((((((((epidemiologic studies[MeSH Terms]) OR cohort studies[MeSH Terms]) OR "epidemiologic"[Text Word]) OR "cohort"[Text Word]) OR "longitudinal"[Text Word]) OR "follow up"[Text Word])) OR observational[Text Word]) OR prospective[Text Word]

**#15** #13 AND #14

## 2. Search strategy for Embase

- #1** 'glucose blood level'/exp OR 'Glucose Intolerance'/exp OR OR 'Hyperglycemia'/exp OR 'hemoglobin A1c'/exp
- #2** 'Blood Glucose':ab,ti OR 'Glucose Intolerance':ab,ti OR 'Prediabetic State':ab,ti OR Hyperglycemia:ab,ti OR 'impaired fasting glucose':ab,ti OR 'impaired glucose tolerance':ab,ti OR 'pre-diabetes':ab,ti OR prediabetes:ab,ti OR 'borderline diabetes':ab,ti OR 'higher risk of diabetes':ab,ti OR 'high risk of diabetes':ab,ti OR 'hemoglobin A1c ':ab,ti OR HbA1c:ab,ti
- #3** #1 OR #2
- #4** 'Cardiovascular Diseases'/exp OR 'cerebrovascular disease'/exp OR Mortality/exp OR Death/exp
- #5** 'cardiovascular disease':ab,ti OR 'cardiocerebrovascular disease':ab,ti OR 'coronary artery disease':ab,ti OR 'coronary heart disease':ab,ti OR 'ischemic heart disease':ab,ti OR 'myocardial infarction':ab,ti OR 'cardiovascular events':ab,ti OR 'cerebrovascular disease':ab,ti OR 'stroke':ab,ti OR 'cerebral infarction' :ab,ti OR Mortality:ab,ti OR fatal:ab,ti OR death:ab,ti
- #6** #4 OR #5
- #7** #3 AND #6
- #8** Animals/exp
- #9** humans/exp
- #10** #8 NOT #9
- #11** #7 NOT #10

**#12** 'Risk'/exp OR risk:ab,ti

**#13** #11 AND #12

**#14** 'cohort analysis'/exp OR 'cohort studies':ab,ti OR 'longitudinal':ab,ti OR 'follow up':ab,ti OR  
observational:ab,ti OR prospective:ab,ti

**#15** #13 AND #14

### 3. Search strategy for Google Scholar

("Blood Glucose" OR "Glucose Intolerance" OR "Prediabetic State" OR Hyperglycemia OR "impaired fasting glucose" OR "impaired glucose tolerance" OR "pre-diabetes" OR prediabetes OR "borderline diabetes" OR "higher risk of diabetes " OR "high risk of diabetes" OR "hemoglobin A<sub>1c</sub>" OR HbA<sub>1c</sub>) AND ("cardiovascular disease" OR "cardiocerebrovascular disease" OR "coronary artery disease" OR "coronary heart disease" OR "ischemic heart disease" OR "myocardial infarction" OR "cardiovascular events" OR "cerebrovascular disease" OR stroke OR "cerebral infarction" OR Mortality OR fatal OR death) AND (risk) AND ("cohort stud\*" OR longitudinal OR "follow up" OR "observational stud\*" OR "prospective stud\*")
