# Supplementary material for: Association between prediabetes and risk of cardiovascular disease and all cause mortality: systematic review and meta-analysis
Source: PubMed Central journal article supplement — BMJ. 2016 Nov 23;355:i5953. doi: 10.1136/bmj.i5953 (PMC5121106; doi:10.1136/bmj.i5953), 2016-11-23
Supplement: huay034601.ww2_default.pdf [file huay034601.ww2_default.pdf]

**Appendix 2: Supplementary tables [posted as supplied by author]**

**Table A. Study characteristics of all the studies included in meta-analysis**

| <b>Study</b>                 | <b>Country/ Region</b> | <b>Prediabetes definition and prevalence (%)</b> | <b>Sample size (% women)</b> | <b>Age (y), average (range or SD)</b> | <b>Follow-up (y)</b> | <b>Baseline CVD excluded</b> | <b>Events for analysis</b>                            | <b>Possibility of enrolling patients with diabetes</b> |
|------------------------------|------------------------|--------------------------------------------------|------------------------------|---------------------------------------|----------------------|------------------------------|-------------------------------------------------------|--------------------------------------------------------|
| Stengard 1992 <sup>28</sup>  | Finland                | IGT (36.7%)                                      | 637 (0%)                     | 72.4 (65-84)                          | 5                    | No                           | CVD mortality<br>All-cause mortality                  | Yes                                                    |
| Barzilay 1999 <sup>29</sup>  | United States          | IFG-WHO (14.6%)<br>IGT (32.1%)                   | 4515 (58%)                   | 73 (5.6)                              | 8                    | Yes                          | CVD incidence                                         | No                                                     |
| DECODE 2001 <sup>30</sup>    | Europe                 | IFG-WHO (10.1%)<br>IGT (11.4%)                   | 22514 (31.7%)                | 53 (30-89)                            | 8.8                  | No                           | CVD mortality<br>CHD mortality<br>All-cause mortality | No                                                     |
| Mazza 2001 <sup>31</sup>     | Italy                  | IFG-WHO (NA)                                     | 3282 (61.0%)                 | 73.8 (≥65)                            | 14                   | No                           | Stroke mortality                                      | Yes                                                    |
| Saydah 2001 <sup>32</sup>    | United States          | IFG-WHO (NA)<br>IGT (17.0%)                      | 3092 (54.3%)                 | 49.6 (30-74)                          | 13.5                 | No                           | CVD mortality<br>All-cause mortality                  | No                                                     |
| Henry 2002 <sup>33</sup>     | France                 | IFG-WHO (17.0%)                                  | 63443 (0%)                   | NA (21-60)                            | 8                    | Yes                          | CVD mortality<br>All-cause mortality                  | Yes                                                    |
| Rodriguez 2002 <sup>34</sup> | Japan                  | IFG-WHO (22.4%)<br>IGT (26.7%)                   | 2034 (0%)                    | NA (71-93)                            | 7                    | Yes                          | CVD mortality<br>All-cause mortality                  | No                                                     |
| Lu 2003 <sup>35</sup>        | United States          | IFG-WHO (10.8%)                                  | 4304 (56.1%)                 | 56.1 (45-74)                          | 9                    | No                           | CVD mortality<br>All-cause mortality                  | Yes                                                    |
| Hunt 2004 <sup>36</sup>      | United States          | IFG-WHO (2.2 %)                                  | 2815 (56.9%)                 | 43.4 (25-46)                          | 12.7                 | Yes                          | CVD mortality<br>All-cause mortality                  | Yes                                                    |
| Nakagami 2004 <sup>37</sup>  | Asia                   | IFG-WHO (6.8%)<br>IGT (16.2%)                    | 6817 (54.2%)                 | 50 (30-89)                            | 5                    | No                           | CVD mortality<br>All-cause mortality                  | No                                                     |
| Nakanishi 2004 <sup>38</sup> | Japan                  | IFG-WHO (4.0%)                                   | 6182 (0%)                    | 47.5 (35-59)                          | 7                    | Yes                          | CVD incidence                                         | Yes                                                    |
| Tai 2004 <sup>39</sup>       | Singapore              | IFG-ADA (18.3%)                                  | 5091 (NA)                    | 37.2 (12)                             | 9.1                  | Yes                          | CHD incidence                                         | No                                                     |
| Tai 2004 <sup>39</sup>       | Singapore              | IGT (13.1%)                                      | 3568 (NA)                    | NA                                    | 8                    | Yes                          | CVD incidence<br>CHD incidence                        | No                                                     |
| Hiltunen 2005 <sup>40</sup>  | Finland                | IGT (34.0%)                                      | 379 (62.8%)                  | 76 (NA)                               | 9.8                  | No                           | All-cause mortality                                   | No                                                     |

| Study                             | Country/ Region | Prediabetes definition and prevalence (%)           | Sample size (% women) | Age (y), average (range or SD) | Follow-up (y) | Baseline CVD excluded | Events for analysis                                | Possibility of enrolling patients with diabetes |
|-----------------------------------|-----------------|-----------------------------------------------------|-----------------------|--------------------------------|---------------|-----------------------|----------------------------------------------------|-------------------------------------------------|
| McNeill 2005 <sup>41</sup>        | United States   | IFG-WHO (12.3%)                                     | 12089 (56.9%)         | 54 (45-64)                     | 11            | Yes                   | CHD incidence                                      | Yes                                             |
| Wild 2005 <sup>42</sup>           | UK              | IFG-WHO (11.9%)<br>IGT (8.3%)                       | 1496 (49.3%)          | 64.8 (55-74)                   | 12.6          | No                    | CVD mortality<br>All-cause mortality               | No                                              |
| Kaarisalo 2006 <sup>43</sup>      | Finland         | IGT (12.3%)                                         | 1032 (52.1%)          | 70 (NA)                        | 9.6           | No                    | Ischaemic stroke                                   | No                                              |
| McNeill 2006 <sup>44</sup>        | United States   | IFG-ADA (45.5%)<br>IFG-WHO (16.5%)                  | 3585 (62%)            | 72 (65-92)                     | 11            | Yes                   | CHD incidence                                      | Yes                                             |
| Palmieri 2006 <sup>45</sup>       | Italy           | IFG-WHO (7.7%)                                      | 20447 (63.6%)         | 50.4 (35-69)                   | 10.4          | No                    | CHD incidence                                      | Yes                                             |
| Barr 2007 <sup>46</sup>           | Australia       | IFG-WHO (5.8%)<br>IGT (12.4%)                       | 10428 (54.8%)         | 51.4 (≥25)                     | 5.2           | No                    | CVD mortality<br>All-cause mortality               | No                                              |
| Liu 2007 <sup>8</sup>             | China           | IFG-ADA (21.1%)                                     | 30378(46.5%)          | 46.9 (35-64)                   | 10            | Yes                   | CVD incidence<br>CHD incidence<br>Stroke incidence | Yes                                             |
| Nilsson 2007 <sup>47</sup>        | Sweden          | IFG-WHO (14%)                                       | 5047 (66%)            | 57.5 (46-68)                   | 10.7          | Yes                   | CVD incidence                                      | Yes                                             |
| Pankow 2007 <sup>48</sup>         | United States   | IFG-ADA (42%)<br>IGT (31%)<br>IFG-ADA and IGT (17%) | 6888 (47%)            | 62.3(52-75)                    | 6.3           | Yes                   | CHD incidence<br>All-cause mortality               | No                                              |
| Rijkelijhuizen 2007 <sup>10</sup> | Netherlands     | IFG-ADA (33.2%)<br>IFG-WHO (10.1%)                  | 1428 (46%)            | 60.5 (50-75)                   | 6.4           | No                    | CVD mortality<br>All-cause mortality               | No*                                             |
| Wang 2007 a <sup>49</sup>         | Finland         | IFG-ADA (NA)<br>IFG-WHO (NA)<br>IGT (NA)            | 1025 (63.2%)          | NA (65-74)                     | 13.5          | No                    | CVD mortality                                      | No                                              |
| Wang 2007 <sup>50</sup>           | China           | IFG-ADA (56.5%)<br>IFG-WHO (28.3%)<br>IGT (24.6%)   | 541 (43.4%)           | 47.8 (≥25)                     | 5             | Yes                   | CHD incidence                                      | No                                              |
| Chien 2008 <sup>51</sup>          | China           | IFG-WHO (NA)<br>IGT (NA)                            | 2165(56%)             | 54.2 (≥35)                     | 10.5          | Yes                   | CVD incidence                                      | No                                              |
| Jin 2008 <sup>52 †</sup>          | China           | IFG-ADA (11.4%)                                     | 1911 (0%)             | 72.5 (6.0)                     | 9.5           | No                    | CVD mortality<br>All-cause mortality               | Yes                                             |
| Kim 2008 <sup>53</sup>            | India           | IFG-ADA (10%)                                       | 2993 (58%)            | 43 (≥35)                       | 10.4          | No                    | CHD mortality                                      | No                                              |

| Study                          | Country/ Region | Prediabetes definition and prevalence (%)            | Sample size (% women) | Age (y), average (range or SD) | Follow-up (y) | Baseline CVD excluded | Events for analysis                                                       | Possibility of enrolling patients with diabetes |
|--------------------------------|-----------------|------------------------------------------------------|-----------------------|--------------------------------|---------------|-----------------------|---------------------------------------------------------------------------|-------------------------------------------------|
| Levitzky 2008 <sup>11</sup>    | United States   | IGT (5.5%)<br>IFG-ADA and IGT (7.7%)<br>IFG-ADA (NA) | 4058 (53.3%)          | 48.5 (10)                      | 4             | Yes                   | CVD incidence                                                             | Yes                                             |
| Oizumi 2008 <sup>54</sup>      | Japan           | IFG-WHO (NA)<br>IGT (12.3%)<br>IFG-WHO (5.8%)        | 2938 (56.1%)          | 57.2 (11)                      | 9.7           | Yes                   | CHD incidence<br>CVD incidence                                            | No                                              |
| Tsai 2008 <sup>55</sup>        | China           | IFG-WHO (6.9%)                                       | 35259 (34.2%)         | 50.9 (≥40)                     | 15            | Yes                   | CHD incidence<br>Stroke incidence<br>CVD mortality<br>All-cause mortality | Yes                                             |
| Wannamethee 2008 <sup>56</sup> | UK              | IFG-WHO (NA)                                         | 5128 (0%)             | NA (40-59)                     | 20            | Yes                   | CHD incidence                                                             | Yes                                             |
| Hyvarinen 2009 <sup>57</sup>   | Finland         | IFG-WHO (17.3%)                                      | 18360 (54.4%)         | 55.2 (25-90)                   | 12.9          | Yes                   | Stroke incidence                                                          | No                                              |
| Sung 2009 <sup>58</sup>        | Sweden          | IGT (21.9%)                                          |                       |                                |               |                       |                                                                           |                                                 |
|                                | Korea           | IFG-ADA (13.4%)<br>IFG-WHO (3.9%)                    | 652901 (0%)           | 43 (30-64)                     | 8.8           | Yes                   | Stroke incidence                                                          | Yes                                             |
| Doi 2010 <sup>59</sup>         | Japan           | IFG-ADA (NA)<br>IFG-WHO (NA)                         | 2421(57%)             | 57.6 (40-79)                   | 14            | Yes                   | CHD incidence<br>Ischemic stroke                                          | No                                              |
| Khang 2010 <sup>12</sup>       | Korea           | IGT (NA)<br>IFG-ADA (32%)                            | 9791 (55.2%)          | 43.2 (15)                      | 5.8           | Yes                   | CVD incidence<br>CHD incidence<br>Stroke incidence                        | Yes                                             |
| Kokubo 2010 <sup>60</sup>      | Japan           | IFG-ADA (28%)                                        | 5321 (53%)            | 55 (30-79)                     | 11.7          | Yes                   | CVD incidence<br>CHD incidence<br>Stroke incidence                        | Yes                                             |
| Magliano 2010 <sup>61</sup>    | Mauritius       | IFG-WHO (5.7%)<br>IGT (20.6%)                        | 9559 (NA)             | 54.4 (20-82)                   | 15.1          | No                    | CVD mortality<br>All-cause mortality                                      | No                                              |
| Skriver 2010 <sup>62</sup>     | Denmark         | HbA1c-NICE (4.1%)                                    | 25184 (53.0%)         | 54.9 (40-69)                   | 6.8           | No                    | All-cause mortality                                                       | No*                                             |
| Sui 2011 <sup>63</sup>         | United States   | IFG-WHO (12.8%)                                      | 43,933(0)             | 44.3 (9.9)                     | 17.7          | Yes                   | Stroke incidence<br>Stroke mortality                                      | Yes                                             |
| Yeboah 2011 <sup>64</sup>      | United States   | IFG-ADA (13.9%)                                      | 6753 (52.9%)          | 62.2 (45-84)                   | 7.5           | Yes                   | CVD incidence                                                             | Yes                                             |

| Study                            | Country/ Region      | Prediabetes definition and prevalence (%) | Sample size (% women) | Age (y), average (range or SD) | Follow-up (y) | Baseline CVD excluded | Events for analysis                                                                                            | Possibility of enrolling patients with diabetes |
|----------------------------------|----------------------|-------------------------------------------|-----------------------|--------------------------------|---------------|-----------------------|----------------------------------------------------------------------------------------------------------------|-------------------------------------------------|
| Ma 2012 <sup>65</sup>            | Korea                | IFG-ADA (15.9%)                           | 16048 (60%)           | 55.7 (≥20)                     | 9.4           | No                    | CHD incidence<br>Stroke incidence<br>All-cause mortality<br>CVD mortality<br>CHD mortality<br>Stroke mortality | Yes                                             |
| Deedwania 2013 <sup>66</sup>     | United States        | IFG-ADA (47%)                             | 4602(57%)             | 73 (≥65)                       | 13            | No                    | CVD mortality<br>All-cause mortality<br>CHD incidence<br>Stroke incidence                                      | No*                                             |
| Kim 2013 <sup>67</sup>           | Korea                | IFG-ADA (17.7%)                           | 408,022 (39.3%)       | 45.5 (≥20)                     | 9.4           | Yes                   | CVD incidence<br>CHD incidence<br>Stroke incidence                                                             | Yes                                             |
| Laukkanen 2013 <sup>9</sup>      | Finland              | IFG-ADA (20.1%)                           | 2641 (0%)             | 52.9 (40-62)                   | 18.8          | No                    | CVD mortality<br>All-cause mortality                                                                           | Yes                                             |
| Onat 2013 <sup>68</sup>          | Turky                | IFG-WHO (5.9%)<br>IGT (4.7%)              | 2619 (51.3%)          | 47.8 (11.8)                    | 7.2           | Yes                   | CHD incidence                                                                                                  | No                                              |
| Schöttker 2013 <sup>69</sup>     | German               | IFG-ADA (21.6%)<br>HbA1c-ADA (37.3%)      | 8365 (55.1%)          | 62 (50-74)                     | 7.9           | Yes                   | CVD incidence                                                                                                  | Yes                                             |
| Selvin 2014 <sup>70</sup>        | United States        | IFG-ADA (48.7%)<br>HbA1c-ADA (23.1%)      | 9051 (58.4%)          | 56.6 (5.6)                     | 6             | Yes                   | CVD incidence<br>All-cause mortality                                                                           | Yes                                             |
| Eastwood 2015 <sup>71</sup>      | South Asia<br>Europe | HbA1c-ADA (31.9%)<br>HbA1c-NICE (10.7%)   | 2475 (16.2%)          | 52 (40-69)                     | 20            | Yes                   | CVD incidence<br>CHD incidence<br>Stroke incidence                                                             | No                                              |
| Gordon-Dseagu 2015 <sup>72</sup> | UK                   | HbA1c-ADA (24%)                           | 22106 (54%)           | 52 (17.7)                      | 7             | No                    | All-cause mortality<br>CVD mortality                                                                           | Yes                                             |
| Paprott 2015 <sup>73</sup>       | German               | HbA1c-ADA (27.8%)                         | 6,299 (49%)           | 45.5 (18-79)                   | 11.6          | Yes                   | All-cause mortality                                                                                            | Yes                                             |

| Study                      | Country/ Region | Prediabetes definition and prevalence (%) | Sample size (% women) | Age (y), average (range or SD) | Follow-up (y) | Baseline CVD excluded | Events for analysis                                                       | Possibility of enrolling patients with diabetes |
|----------------------------|-----------------|-------------------------------------------|-----------------------|--------------------------------|---------------|-----------------------|---------------------------------------------------------------------------|-------------------------------------------------|
| Samaras 2015 <sup>74</sup> | Australia       | IFG-ADA (40.7%)<br>IFG-WHO (NA)           | 945 (54%)             | 78.6 (4.7)                     | 2             | No                    | All-cause mortality<br>CHD incidence<br>Stroke incidence                  | Yes                                             |
| Kim 2016 <sup>75</sup>     | Korea           | IFG-ADA (26.4%)<br>HbA1c-ADA (19.3%)      | 76434 (42.8%)         | 47.5 (10.5)                    | 3.1           | Yes                   | CVD incidence<br>CHD incidence<br>Stroke incidence<br>All-cause mortality | Yes                                             |

\* OGTT was performed in this study to exclude diabetes; † article in Chinese

CHD=coronary heart disease; CVD=cardiovascular disease; DECODE=Diabetes Epidemiology: Collaborative analysis Of Diagnostic criteria in Europe; HDL-C=high-density lipoprotein cholesterol; HbA1c-ADA=prediabetes defined as raised HbA1c according to the American Diabetes Association criteria (39-47 mmol/mol); HbA1c-NICE=prediabetes defined as raised HbA1c according to the NICE guidance (42-47 mmol/mol); IFG-ADA=impaired fasting glucose according to the American Diabetes Association criteria (fasting plasma glucose of 5.6-6.9 mmol/L); IFG-WHO=impaired fasting glucose according to the World Health Organization criteria (fasting plasma glucose of 6.1-6.9 mmol/L); IGT=impaired glucose tolerance; NA=not available; SD=standard deviation

**Table B. Quality Assessment of the Included Studies**

| <b>Study</b>                      | <b>Selection<br/>(stars<br/>awarded)</b> | <b>(stars</b> | <b>Comparability (stars awarded)</b> | <b>Outcome (stars awarded)</b> | <b>Quality (total stars awarded)</b> |
|-----------------------------------|------------------------------------------|---------------|--------------------------------------|--------------------------------|--------------------------------------|
| Stengard 1992 <sup>28</sup>       | 3                                        |               | 2                                    | 3                              | Good (8)                             |
| Barzilay 1999 <sup>29</sup>       | 4                                        |               | 2                                    | 1                              | Good (7)                             |
| DECODE 2001 <sup>30</sup>         | 3                                        |               | 2                                    | 3                              | Good (8)                             |
| Mazza 2001 <sup>32</sup>          | 3                                        |               | 1                                    | 2                              | Fair (6)                             |
| Saydah 2001 <sup>32</sup>         | 3                                        |               | 2                                    | 3                              | Good (8)                             |
| Henry 2002 <sup>33</sup>          | 4                                        |               | 2                                    | 3                              | Good (9)                             |
| Rodriguez 2002 <sup>34</sup>      | 4                                        |               | 2                                    | 2                              | Good (8)                             |
| Lu 2003 <sup>35</sup>             | 3                                        |               | 2                                    | 3                              | Good (8)                             |
| Hunt 2004 <sup>36</sup>           | 4                                        |               | 1                                    | 3                              | Good (8)                             |
| Nakagami 2004 <sup>37</sup>       | 3                                        |               | 2                                    | 2                              | Good (7)                             |
| Nakanishi 2004 <sup>38</sup>      | 4                                        |               | 2                                    | 2                              | Good (8)                             |
| Tai 2004 <sup>39</sup>            | 4                                        |               | 1                                    | 2                              | Good (7)                             |
| Hiltunen 2005 <sup>40</sup>       | 3                                        |               | 2                                    | 2                              | Good (7)                             |
| McNeill 2005 <sup>41</sup>        | 3                                        |               | 2                                    | 2                              | Good (7)                             |
| Wild 2005 <sup>42</sup>           | 3                                        |               | 1                                    | 3                              | Good (7)                             |
| Kaarisalo 2006 <sup>43</sup>      | 4                                        |               | 1                                    | 2                              | Good (7)                             |
| McNeill 2006 <sup>44</sup>        | 4                                        |               | 1                                    | 3                              | Good (8)                             |
| Palmieri 2006 <sup>45</sup>       | 3                                        |               | 2                                    | 2                              | Good (7)                             |
| Barr 2007 <sup>46</sup>           | 4                                        |               | 1                                    | 2                              | Good (7)                             |
| Liu 2007 <sup>8</sup>             | 4                                        |               | 1                                    | 3                              | Good (8)                             |
| Nilsson 2007 <sup>47</sup>        | 4                                        |               | 2                                    | 2                              | Good (8)                             |
| Pankow 2007 <sup>48</sup>         | 3                                        |               | 1                                    | 3                              | Good (7)                             |
| Rijkelijhuizen 2007 <sup>10</sup> | 3                                        |               | 1                                    | 2                              | Fair (6)                             |
| Wang 2007 a <sup>49</sup>         | 4                                        |               | 1                                    | 3                              | Good (8)                             |
| Wang 2007 <sup>50</sup>           | 4                                        |               | 1                                    | 2                              | Good (7)                             |
| Chien 2008 <sup>51</sup>          | 3                                        |               | 2                                    | 2                              | Good (7)                             |
| Jin 2008 <sup>52</sup>            | 3                                        |               | 1                                    | 2                              | Fair (6)                             |

| <b>Study</b>                     | <b>Selection<br/>awarded)</b> | <b>(stars</b> | <b>Comparability (stars awarded)</b> | <b>Outcome (stars awarded)</b> | <b>Quality (total stars awarded)</b> |
|----------------------------------|-------------------------------|---------------|--------------------------------------|--------------------------------|--------------------------------------|
| Kim 2008 <sup>53</sup>           | 4                             |               | 2                                    | 2                              | Good (8)                             |
| Levitzky 2008 <sup>11</sup>      | 4                             |               | 1                                    | 2                              | Good (7)                             |
| Oizumi 2008 <sup>54</sup>        | 2                             |               | 1                                    | 2                              | Fair (5)                             |
| Tsai 2008 <sup>55</sup>          | 2                             |               | 1                                    | 2                              | Fair (5)                             |
| Wannamethee 2008 <sup>56</sup>   | 4                             |               | 1                                    | 2                              | Good (7)                             |
| Hyvarinen 2009 <sup>57</sup>     | 4                             |               | 2                                    | 2                              | Good (8)                             |
| Sung 2009 <sup>58</sup>          | 4                             |               | 2                                    | 2                              | Good (8)                             |
| Doi 2010 <sup>59</sup>           | 4                             |               | 2                                    | 2                              | Good (8)                             |
| Khang 2010 <sup>12</sup>         | 4                             |               | 2                                    | 2                              | Good (8)                             |
| Kokubo 2010 <sup>60</sup>        | 4                             |               | 2                                    | 3                              | Good (9)                             |
| Magliano 2010 <sup>61</sup>      | 3                             |               | 1                                    | 2                              | Fair (6)                             |
| Skriver 2010 <sup>62</sup>       | 3                             |               | 2                                    | 2                              | Good (7)                             |
| Sui 2011 <sup>63</sup>           | 4                             |               | 2                                    | 2                              | Good (8)                             |
| Yeboah 2011 <sup>64</sup>        | 4                             |               | 2                                    | 3                              | Good (9)                             |
| Ma 2012 <sup>65</sup>            | 3                             |               | 1                                    | 2                              | Fair (6)                             |
| Deedwania 2013 <sup>66</sup>     | 4                             |               | 2                                    | 2                              | Good (8)                             |
| Kim 2013 <sup>67</sup>           | 4                             |               | 2                                    | 2                              | Good (8)                             |
| Laukkanen 2013 <sup>9</sup>      | 3                             |               | 2                                    | 2                              | Good (7)                             |
| Onat 2013 <sup>68</sup>          | 4                             |               | 2                                    | 2                              | Good (8)                             |
| Schöttker 2013 <sup>69</sup>     | 4                             |               | 2                                    | 3                              | Good (9)                             |
| Selvin 2014 <sup>70</sup>        | 4                             |               | 2                                    | 3                              | Good (9)                             |
| Eastwood 2015 <sup>71</sup>      | 4                             |               | 2                                    | 2                              | Good (8)                             |
| Gordon-Dseagu 2015 <sup>72</sup> | 3                             |               | 1                                    | 2                              | Fair (6)                             |
| Paprott 2015 <sup>73</sup>       | 4                             |               | 2                                    | 2                              | Good (8)                             |
| Samaras 2015 <sup>74</sup>       | 3                             |               | 2                                    | 1                              | Fair (6)                             |
| Kim 2016 <sup>75</sup>           | 4                             |               | 2                                    | 1                              | Good (7)                             |

**Table C. Confounders Adjusted and Quality Assessment of the Included Studies**

| <b>Study</b>                 | <b>Confounder adjusted</b>                                                                                                                                                                  | <b>Adequate adjustment†</b> |
|------------------------------|---------------------------------------------------------------------------------------------------------------------------------------------------------------------------------------------|-----------------------------|
| Stengard 1992 <sup>28</sup>  | Age, BMI, hypertension, smoking, TC, HDL-C and functional capacity                                                                                                                          | Yes                         |
| Barzilay 1999 <sup>29</sup>  | Age, sex, ethnic group, smoking, BMI, LDL-C and hypertension.                                                                                                                               | Yes                         |
| DECODE 2001 <sup>30</sup>    | Age, sex, center, TC, BMI, SBP, smoking                                                                                                                                                     | Yes                         |
| Mazza 2001 <sup>32</sup>     | Age, historical stroke and CHD, hypertension, SBP, pulse pressure, atrial fibrillation, LV hypertrophy, uric acid, smoking and serum potassium and sodium                                   | No                          |
| Saydah 2001 <sup>32</sup>    | Age, sex, race, education, smoking, physical activity , BMI, SBP, TC:HDL-C ratio                                                                                                            | Yes                         |
| Henry 2002 <sup>33</sup>     | Age, TC, TG, BMI, smoking and BP                                                                                                                                                            | Yes                         |
| Rodriguez 2002 <sup>34</sup> | Age, BMI, waist-to-hip ratio, physical activity, hypertension, TG, HDL-C, fibrinogen                                                                                                        | Yes                         |
| Lu 2003 <sup>35</sup>        | Age, sex, BMI, physical activity, study center, smoking, alcohol consumption, hypertension, insulin, TC, HDL-C, and TG.                                                                     | Yes                         |
| Hunt 2004 <sup>36</sup>      | Age, gender, and ethnic group                                                                                                                                                               | No                          |
| Nakagami 2004 <sup>37</sup>  | Age, sex, cohort, BMI, SBP, TC and smoking.                                                                                                                                                 | Yes                         |
| Nakanishi 2004 <sup>38</sup> | Age, family history of diabetes, alcohol consumption, cigarette smoking, and all other components of the metabolic syndrome                                                                 | Yes                         |
| Tai 2004 <sup>39</sup>       | Age, sex, ethnicity                                                                                                                                                                         | No                          |
| Hiltunen 2005 <sup>40</sup>  | Age, gender, presence of CVD, hypertension, BMI, smoking, physical activity and self-perceived health                                                                                       | Yes                         |
| McNeill 2005 <sup>41</sup>   | Age, sex, hypertension, TC:HDL-C ratio, TG, smoking, baseline CVD.                                                                                                                          | Yes                         |
| Wild 2005 <sup>42</sup>      | Sex, previous stroke/TIA, perceived health status, hypertension, BP, angina pectoris, previous MI, cardiac failure, atrial fibrillation, claudication, acetylsalicylic acid in use, smoking | No                          |
| Kaarisalo 2006 <sup>43</sup> | Age, sex, race                                                                                                                                                                              | No                          |
| McNeill 2006 <sup>44</sup>   | Age, sex, center                                                                                                                                                                            | No                          |
| Palmieri 2006 <sup>45</sup>  | Age, sex, previously CVD, smoking, hypertension, waist circumference, lipid-lowering medication use, and TC:HDL-C ratio.                                                                    | Yes                         |
| Barr 2007 <sup>46</sup>      | Age, sex, smoking, CVD family history, and TC                                                                                                                                               | No                          |
| Liu 2007 <sup>8</sup>        | Age, sex                                                                                                                                                                                    | No                          |
| Nilsson 2007 <sup>47</sup>   | Age, sex, race, center, smoking, hypertension, LDL-C, HDL-C, TG, lipid-lowering medications, BMI, and waist circumference.                                                                  | Yes                         |



| <b>Study</b>                   | <b>Confounder adjusted</b>                                                                                                                                                                                                                                                                            | <b>Adequate adjustment†</b> |
|--------------------------------|-------------------------------------------------------------------------------------------------------------------------------------------------------------------------------------------------------------------------------------------------------------------------------------------------------|-----------------------------|
| Pankow 2007 <sup>48</sup>      | Age, sex                                                                                                                                                                                                                                                                                              | No                          |
| Rijkelloos 2007 <sup>10</sup>  | Age, sex, history of MI and stroke, current smoking, consumption of alcohol, physical activity and TC.                                                                                                                                                                                                | No                          |
| Wang 2007 a <sup>49</sup>      | Age, sex, education, occupation, smoking, diabetic family history, and TC                                                                                                                                                                                                                             | No                          |
| Wang 2007 <sup>50</sup>        | Age, sex, BMI, smoking, alcohol, marital status, education, occupation, exercise, family history of CHD                                                                                                                                                                                               | No                          |
| Chien 2008 <sup>51</sup>       | Age, post load plasma glucose, BMI, SBP, DBP, HDL-C, TC, TG                                                                                                                                                                                                                                           | Yes                         |
| Jin 2008 <sup>52</sup>         | Age, sex                                                                                                                                                                                                                                                                                              | No                          |
| Kim 2008 <sup>53</sup>         | Age, sex, SBP, hypertension treatment, TC/HDL ratio, smoking, and BMI                                                                                                                                                                                                                                 | Yes                         |
| Levitzy 2008 <sup>11</sup>     | Age, sex, hypertension                                                                                                                                                                                                                                                                                | No                          |
| Oizumi 2008 <sup>54</sup>      | Age, gender, and smoking status                                                                                                                                                                                                                                                                       | No                          |
| Tsai 2008 <sup>55</sup>        | Age, gender, and smoking status                                                                                                                                                                                                                                                                       | No                          |
| Wannamethee 2008 <sup>56</sup> | Age, smoking, social class, physical activity and alcohol intake                                                                                                                                                                                                                                      | No                          |
| Hyvarinen 2009 <sup>57</sup>   | Age, sex, center, mean arterial pressure, BMI, TC, smoking                                                                                                                                                                                                                                            | Yes                         |
| Sung 2009 <sup>58</sup>        | Age, height, smoking, alcohol consumption, regular exercise, level of monthly salary, area of residence, BP, TC, and BMI.                                                                                                                                                                             | Yes                         |
| Doi 2010 <sup>59</sup>         | Age, sex, SBP, electrocardiogram abnormalities, BMI, TC, HDL-C, smoking, alcohol intake, and regular exercise.                                                                                                                                                                                        | Yes                         |
| Khang 2010 <sup>12</sup>       | Age, sex, central obesity, hypertriglyceridemia, HDL-C, hypertension                                                                                                                                                                                                                                  | Yes                         |
| Kokubo 2010 <sup>60</sup>      | Age, sex, BMI, hypertension, hyperlipidemia, and smoking and drinking status                                                                                                                                                                                                                          | Yes                         |
| Magliano 2010 <sup>61</sup>    | Prior CVD, education, sex, hypertension, waist and hip circumference, smoking, HDL-C, TG, and TC.                                                                                                                                                                                                     | No                          |
| Skriver 2010 <sup>62</sup>     | Age, sex, BMI, smoking, SBP, history of ischaemic heart disease, cerebrovascular disease and cancer                                                                                                                                                                                                   | Yes                         |
| Sui 2011 <sup>63</sup>         | Age, year of examination, smoking, alcohol intake, family history of CVD, and survey indicator, BMI, TC, abnormal ECG, and hypertension.                                                                                                                                                              | Yes                         |
| Yeboah 2011 <sup>64</sup>      | Age, sex, race/ethnicity, BMI, SBP, TC, HDL-C, TG, smoking, BP medications and statin use.                                                                                                                                                                                                            | Yes                         |
| Ma 2012 <sup>65</sup>          | Age, sex, educational, alcohol consumption, history of hypertension and BMI                                                                                                                                                                                                                           | No                          |
| Deedwania 2013 <sup>66</sup>   | Age, sex, race/ethnicity, married, education, income, BMI, activities of daily living, smoking, alcohol use, ankle arm index ratio, hemoglobin, TC, albumin, uric acid, C-reactive protein, serum insulin, LV hypertrophy, atrial fibrillation, bundle branch block, LV systolic dysfunction, chronic | Yes                         |

| Study                            | Confounder adjusted                                                                                                                                                                                                                                | Adequate adjustment† |
|----------------------------------|----------------------------------------------------------------------------------------------------------------------------------------------------------------------------------------------------------------------------------------------------|----------------------|
| Kim 2013 <sup>67</sup>           | disease and medicine<br>Age, SBP, antihypertensive medication, LDL-C, HDL-C, current smoking, BMI, and family history of CVD.                                                                                                                      | Yes                  |
| Laukkanen 2013 <sup>9</sup>      | Age, BMI, SBP, LDL-C, smoking, alcohol consumption, prevalent CHD, and family history of CHD                                                                                                                                                       | Yes                  |
| Onat 2013 <sup>68</sup>          | Age, sex, SBP, non-HDL-C, waist circumference, smoking, and C-reactive protein                                                                                                                                                                     | Yes                  |
| Schöttker 2013 <sup>69</sup>     | Age, sex, SBP, current smoking and TC/HDL-C ratio                                                                                                                                                                                                  | Yes                  |
| Selvin 2014 <sup>70</sup>        | Age, sex, race-center, BMI, C-reactive protein, smoking, SBP, LDL-C, HDL-C, TG, estimated glomerular filtration rate, current use of hypertension medication, current lipid-lowering medication use, alcohol use and left ventricular hypertrophy. | Yes                  |
| Eastwood 2015 <sup>71</sup>      | Age, sex, smoking, total-to-HDL cholesterol ratio, waist-to-hip ratio, SBP, antihypertensive treatment.                                                                                                                                            | Yes                  |
| Gordon-Dseagu 2015 <sup>72</sup> | Age, sex, smoking, BMI, socioeconomic status                                                                                                                                                                                                       | No                   |
| Paprott 2015 <sup>73</sup>       | Age, sex, educational level, smoking, sport activity, alcohol consumption, BMI, waist circumference, history of myocardial infarction, stroke, or cancer, and history of hypertension or hyperlipidemia                                            | Yes                  |
| Samaras 2015 <sup>74</sup>       | Age, sex, hypertension, BMI, smoking                                                                                                                                                                                                               | Yes                  |
| Kim 2016 <sup>75</sup>           | Age, sex, hypertension, LDL-C, HDL-C, smoking, family history of CVD, and BMI                                                                                                                                                                      | Yes                  |

†Adequate adjustment denoted adjustment of at least five of six confounders including sex, age, hypertension or blood pressure or antihypertensive treatment, body mass index or other measure of overweight/obesity, cholesterol, and smoking

BMI: body mass index; BP: blood pressure; HDL-C: high-density lipoprotein cholesterol; LDL-C: low-density lipoprotein cholesterol; LV: left ventricular; CHD: coronary heart disease; CVD: cardiovascular disease; MI: myocardial infarction; SBP: systolic blood pressure; TC: total cholesterol; TG: triglycerides

**Table D. Definition of composite cardiovascular disease in the Included Studies**

| <b>Study</b>                       | <b>Definition of composite cardiovascular disease</b>                                                                                                                                                               |
|------------------------------------|---------------------------------------------------------------------------------------------------------------------------------------------------------------------------------------------------------------------|
| Stengard 1992 <sup>28</sup>        | CHD and stroke                                                                                                                                                                                                      |
| Barzilay 1999 <sup>29</sup>        | CHD and stroke                                                                                                                                                                                                      |
| DECODE 2001 <sup>30</sup>          | ICD-9 codes: 401-448                                                                                                                                                                                                |
| Saydah 2001 <sup>32</sup>          | ICD-9 codes: 401-448                                                                                                                                                                                                |
| Henry 2002 <sup>33</sup>           | ICD-9 codes: 390-459                                                                                                                                                                                                |
| Rodriguez 2002 <sup>34</sup>       | CHD, stroke and sudden death                                                                                                                                                                                        |
| Lu 2003 <sup>35</sup>              | ICD-9 codes: 390-448                                                                                                                                                                                                |
| Hunt 2004 <sup>36</sup>            | ICD-9 codes: 401-405, 410-414, 420-429 (with the exception of 427.5), 430-439, or 440-447 .                                                                                                                         |
| Nakagami 2004 <sup>37</sup>        | ICD-9 codes: 401-448                                                                                                                                                                                                |
| Nakanishi 2004 <sup>38</sup>       | CHD and stroke                                                                                                                                                                                                      |
| Tai 2004 <sup>39</sup>             | ICD-9 codes: 401-448                                                                                                                                                                                                |
| Wild 2005 <sup>42</sup>            | ICD-9 codes: 410-414, 430-438, 440-445 and<br>ICD-10 codes: I21-25, I60-73                                                                                                                                          |
| Barr 2007 <sup>46</sup>            | ICD-10 codes: I10-I25, I46.1, I48, I50-I99, or R96                                                                                                                                                                  |
| Liu 2007 <sup>8</sup>              | CHD, stroke and sudden death                                                                                                                                                                                        |
| Nilsson 2007 <sup>47</sup>         | ICD-9 codes: 410-414, 430, 431, 434, 436                                                                                                                                                                            |
| Rijkelijkhuisen 2007 <sup>10</sup> | ICD-9 codes: 390-459, 798                                                                                                                                                                                           |
| Wang 2007 a <sup>49</sup>          | ICD-9 codes: 390-459                                                                                                                                                                                                |
| Chien 2008 <sup>51</sup>           | CHD and stroke                                                                                                                                                                                                      |
| Jin 2008 <sup>52 †</sup>           | CHD death, sudden death, stroke death,                                                                                                                                                                              |
| Levitzky 2008 <sup>11</sup>        | CHD, stroke, transient ischemic attack (TIA), intermittent claudication, congestive heart failure, or CVD death                                                                                                     |
| Oizumi 2008 <sup>54</sup>          | CHD and stroke                                                                                                                                                                                                      |
| Tsai 2008 <sup>55</sup>            | ICD-9 codes: 390-459                                                                                                                                                                                                |
| Khang 2010 <sup>12</sup>           | ICD-10 codes: I20-I25, I60-I69                                                                                                                                                                                      |
| Kokubo 2010 <sup>60</sup>          | CHD and stroke                                                                                                                                                                                                      |
| Magliano 2010 <sup>61</sup>        | Deaths categorized as cardiac, cerebrovascular, hypertension, or renal failure the primary cause                                                                                                                    |
| Yeboah 2011 <sup>64</sup>          | MI, definite angina, probable angina (if followed by coronary artery bypass grafting and percutaneous coronary intervention), resuscitated cardiac arrest, stroke, stroke death, CHD death or other CVD death       |
| Ma 2012 <sup>65</sup>              | ICD-10 codes: I00-I99                                                                                                                                                                                               |
| Deedwania 2013 <sup>66</sup>       | MI, angina pectoris, stroke, and peripheral artery disease.                                                                                                                                                         |
| Kim 2013 <sup>67</sup>             | ICD-10 codes: I10-I15, I20-I25, I44-I51, I60-69, I70-I74, R96),                                                                                                                                                     |
| Laukkanen 2013 <sup>9</sup>        | ICD-9 codes: 798                                                                                                                                                                                                    |
| Selvin 2014 <sup>68</sup>          | CHD and stroke                                                                                                                                                                                                      |
| Schöttker 2013 <sup>69</sup>       | MI, stroke or cardiovascular death (ICD-10 codes: I00-I99).                                                                                                                                                         |
| Eastwood 2015 <sup>71</sup>        | CHD and stroke                                                                                                                                                                                                      |
| Gordon-Dseagu 2015 <sup>72</sup>   | ICD-9 codes:390–459; ICD-10 codes:I00-I99                                                                                                                                                                           |
| Kim 2016 <sup>75</sup>             | Cardiovascular death (ICD-10 codes: I00-99 and R96 ), MI, stroke, coronary revascularization, hospitalization or outpatient visit with ischemic heart disease, other vascular disease, or congestive heart failure. |

CHD: coronary heart disease; CVD: cardiovascular disease; ICD: International Classification of Diseases; MI: myocardial infarction

**Table E. Subgroup Analyses of the Association between Prediabetes and All-Cause Mortality**

| Subgroups                                              | IFG-ADA       |                   |       | IFG-WHO       |                   |      | IGT           |                   |      |
|--------------------------------------------------------|---------------|-------------------|-------|---------------|-------------------|------|---------------|-------------------|------|
|                                                        | No of studies | RR (95% CI)       | P *   | No of studies | RR (95% CI)       | P *  | No of studies | RR (95% CI)       | P *  |
| <b>Ethnicity</b>                                       |               |                   | 0.36  |               |                   | 0.79 |               |                   | 0.89 |
| Asians                                                 | 2             | 1.24 (1.01, 1.53) |       | 3             | 1.14 (1.02, 1.27) |      | 3             | 1.30 (1.08, 1.56) |      |
| Non-Asians                                             | 7             | 1.11 (0.98, 1.25) |       | 10            | 1.16 (1.03, 1.31) |      | 8             | 1.32 (1.23, 1.41) |      |
| <b>Sex</b>                                             |               |                   | -     |               |                   | 0.68 |               |                   | 0.63 |
| Male                                                   | 2             | 1.28 (1.11, 1.46) |       | 4             | 1.14 (1.03, 1.26) |      | 5             | 1.34 (1.21, 1.48) |      |
| Female                                                 | 0             | -                 |       | 2             | 1.07 (0.79, 1.44) |      | 4             | 1.28 (1.11, 1.48) |      |
| <b>Participant's average age</b>                       |               |                   | 0.009 |               |                   | 0.88 |               |                   | 0.07 |
| <55 years                                              | 3             | 1.28 (1.13, 1.46) |       | 7             | 1.12 (1.05, 1.21) |      | 5             | 1.36 (1.26, 1.47) |      |
| ≥55 years                                              | 6             | 1.04 (0.96, 1.13) |       | 5             | 1.15 (0.91, 1.45) |      | 5             | 1.19 (1.04, 1.35) |      |
| <b>Follow-up duration</b>                              |               |                   | 0.86  |               |                   | 0.38 |               |                   | 0.47 |
| <10 years                                              | 7             | 1.12 (0.99, 1.27) |       | 8             | 1.21 (1.04, 1.41) |      | 7             | 1.34 (1.24, 1.44) |      |
| ≥10 years                                              | 2             | 1.15 (0.91, 1.46) |       | 5             | 1.12 (1.01, 1.23) |      | 4             | 1.27 (1.13, 1.42) |      |
| <b>Possibility of enrolling patients with diabetes</b> |               |                   | 0.35  |               |                   | 0.65 |               |                   | 0.64 |
| None                                                   | 3             | 1.08 (0.89, 1.31) |       | 9             | 1.13 (1.02, 1.25) |      | 10            | 1.32 (1.23, 1.41) |      |
| Might enrolled                                         | 6             | 1.20 (1.08, 1.34) |       | 4             | 1.17 (1.05, 1.31) |      | 1             | 1.17 (0.71, 1.93) |      |
| <b>Exclusion of individuals with baseline CVD</b>      |               |                   | 0.14  |               |                   | 0.73 |               |                   | 0.87 |
| Yes                                                    | 4             | 1.02 (0.86, 1.19) |       | 4             | 1.17 (1.05, 1.30) |      | 2             | 1.34 (1.0, 1.81)  |      |
| No                                                     | 5             | 1.19 (1.03, 1.38) |       | 9             | 1.13 (1.02, 1.27) |      | 9             | 1.31 (1.23, 1.4)  |      |
| <b>Adjustment of confounders</b>                       |               |                   | 0.11  |               |                   | 0.81 |               |                   | 0.91 |
| Adequate <sup>†</sup>                                  | 8             | 1.09 (1.02, 1.18) |       | 9             | 1.14 (1.04, 1.25) |      | 10            | 1.32 (1.23, 1.41) |      |
| Not adequate                                           | 1             | 1.41 (1.04, 1.91) |       | 4             | 1.17 (0.98, 1.39) |      | 1             | 1.30 (1.11, 1.53) |      |

IFG-ADA=impaired fasting glucose according to the American Diabetes Association definition (fasting glucose 5.6-6.9 mmol/L); IFG-WHO=impaired fasting glucose according to the World Health Organization definition (fasting glucose 6.1-6.9 mmol/L); IGT=impaired glucose tolerance

\* For heterogeneity among subgroups.

† Adequate adjustment denoted adjustment of at least five of six confounders including sex, age, hypertension or blood pressure or antihypertensive treatment, body mass index or other measure of overweight/obesity, cholesterol, and smoking

**Table F: Subgroup Analyses of the Association between Prediabetes and Risk of Composite Cardiovascular Diseases**

| Subgroups                                              | IFG-ADA       |                   |      | IFG-WHO       |                   |      | IGT           |                   |      |
|--------------------------------------------------------|---------------|-------------------|------|---------------|-------------------|------|---------------|-------------------|------|
|                                                        | No of studies | RR (95% CI)       | P*   | No of studies | RR (95% CI)       | P*   | No of studies | RR (95% CI)       | P*   |
| <b>Ethnicity</b>                                       |               |                   | 0.65 |               |                   | 0.92 |               |                   | 0.74 |
| Asians                                                 | 7             | 1.11 (1.01, 1.26) |      | 6             | 1.24 (0.97, 1.58) |      | 5             | 1.33 (1.12, 1.58) |      |
| Non-Asians                                             | 8             | 1.15 (1.04, 1.27) |      | 12            | 1.26 (1.10, 1.43) |      | 8             | 1.29 (1.17, 1.42) |      |
| <b>Sex</b>                                             |               |                   | 0.40 |               |                   | 0.91 |               |                   | 0.66 |
| Male                                                   | 8             | 1.09 (1.01, 1.18) |      | 6             | 1.17 (1.03, 1.33) |      | 4             | 1.34 (1.17, 1.53) |      |
| Female                                                 | 7             | 1.18 (1.00, 1.39) |      | 3             | 1.19 (0.86, 1.65) |      | 3             | 1.27 (1.04, 1.55) |      |
| <b>Participant's average age</b>                       |               |                   | 0.49 |               |                   | 0.78 |               |                   | 0.98 |
| <55 years                                              | 6             | 1.11 (1.01, 1.21) |      | 9             | 1.27 (1.04, 1.55) |      | 6             | 1.29 (1.16, 1.44) |      |
| ≥55 years                                              | 9             | 1.16 (1.04, 1.30) |      | 8             | 1.22 (1.04, 1.44) |      | 6             | 1.29 (1.13, 1.46) |      |
| <b>Follow-up duration</b>                              |               |                   | 0.15 |               |                   | 0.54 |               |                   | 0.87 |
| <10 years                                              | 10            | 1.08 (1.01, 1.15) |      | 10            | 1.22 (1.02, 1.44) |      | 8             | 1.31 (1.18, 1.44) |      |
| ≥10 years                                              | 5             | 1.22 (1.05, 1.41) |      | 8             | 1.31 (1.12, 1.52) |      | 5             | 1.29 (1.12, 1.48) |      |
| <b>Possibility of enrolling patients with diabetes</b> |               |                   | 0.19 |               |                   | 0.31 |               |                   | 0.65 |
| None                                                   | 2             | 1.31 (1.04, 1.65) |      | 12            | 1.22 (1.05, 1.42) |      | 12            | 1.30 (1.20, 1.42) |      |
| Might enrolled                                         | 12            | 1.12 (1.04, 1.20) |      | 6             | 1.36 (1.08, 1.57) |      | 1             | 1.13 (0.62, 2.06) |      |
| <b>Exclusion of individuals with baseline CVD</b>      |               |                   | 0.22 |               |                   | 0.1  |               |                   | 0.74 |
| Yes                                                    | 9             | 1.10 (1.03, 1.18) |      | 9             | 1.38 (1.23, 1.55) |      | 5             | 1.27 (1.09, 1.49) |      |
| No                                                     | 6             | 1.27 (1.02, 1.58) |      | 9             | 1.15 (0.97, 1.38) |      | 8             | 1.31 (1.19, 1.45) |      |
| <b>CVD endpoint</b>                                    |               |                   | 0.22 |               |                   | 0.22 |               |                   | 0.90 |
| CVD incidence                                          | 9             | 1.10 (1.03, 1.18) |      | 5             | 1.39 (1.16, 1.68) |      | 4             | 1.29 (1.11, 1.50) |      |
| CVD mortality                                          | 6             | 1.27 (1.02, 1.58) |      | 13            | 1.20 (1.05, 1.38) |      | 9             | 1.30 (1.18, 1.44) |      |
| <b>Adjustment of confounders</b>                       |               |                   | 0.05 |               |                   | 0.13 |               |                   | 0.34 |
| Adequate <sup>†</sup>                                  | 11            | 1.09 (1.02, 1.18) |      | 10            | 1.16 (0.98, 1.37) |      | 8             | 1.26 (1.14, 1.40) |      |
| Not adequate                                           | 4             | 1.26 (1.12, 1.43) |      | 8             | 1.37 (1.19, 1.58) |      | 4             | 1.38 (1.18, 1.61) |      |

CVD=cardiovascular disease; IFG-ADA=impaired fasting glucose according to the American Diabetes Association definition (fasting glucose 5.6-6.9 mmol/L); IFG WHO= impaired fasting glucose according to the World Health Organization definition (fasting glucose 6.1-6.9 mmol/L); IGT=impaired glucose tolerance

\* For heterogeneity among subgroups.

† Adequate adjustment denoted adjustment of at least five of six confounders including sex, age, hypertension or blood pressure or antihypertensive treatment, body mass index or other measure of overweight/obesity, cholesterol, and smoking
