# Supplementary material for: Association between prediabetes and risk of cardiovascular disease and all cause mortality: systematic review and meta-analysis
Source: PubMed Central journal article supplement — BMJ. 2016 Nov 23;355:i5953. doi: 10.1136/bmj.i5953 (PMC5121106; doi:10.1136/bmj.i5953), 2016-11-23

**Appendix 3: Supplementary funnel Plots for Detection for Publication Bias [posted as supplied by author]**

**Fig A. Comparison: Prediabetes vs. normoglycaemia, Outcome: All-Cause Mortality**

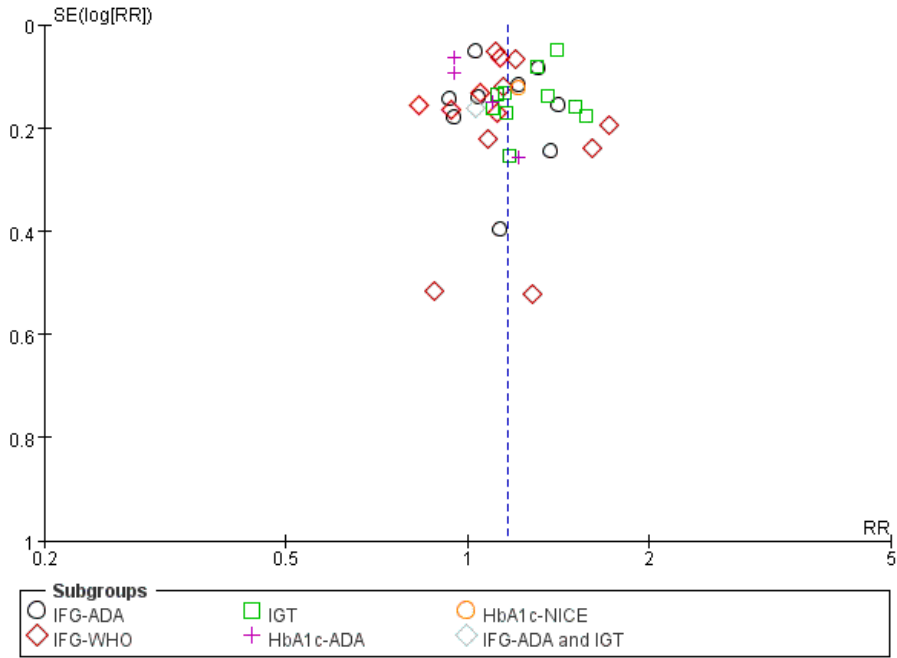

**Fig B Comparison: Prediabetes vs. normoglycaemia, Outcome: composite cardiovascular events.**

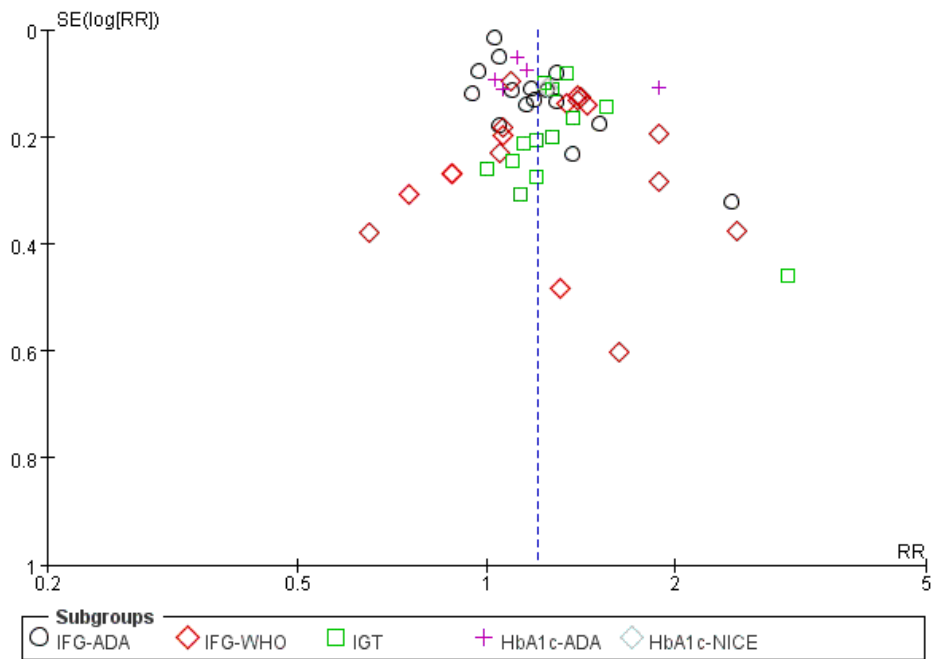

**Fig C Comparison: Prediabetes vs. normoglycaemia, Outcome: coronary heart disease.**

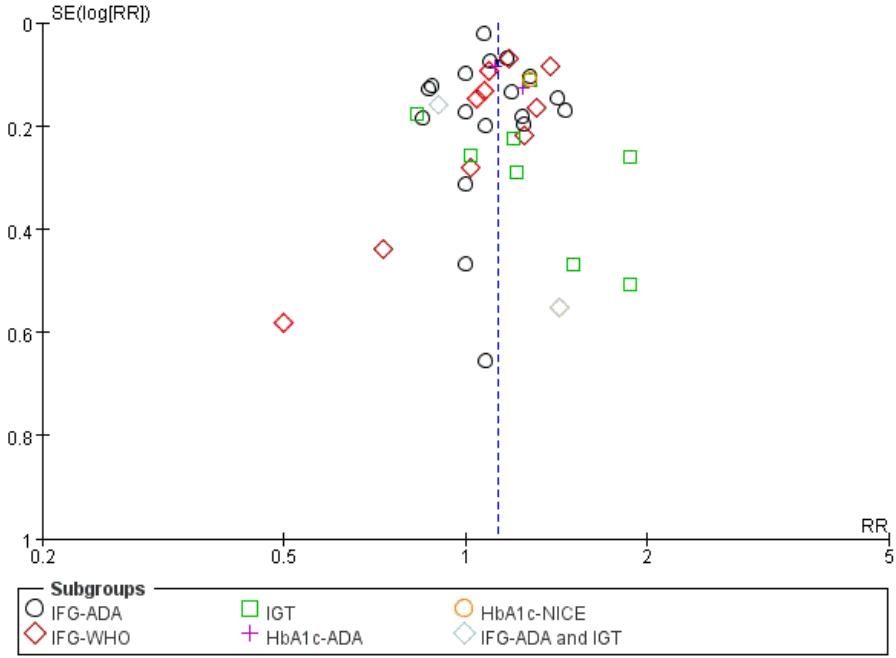

**Fig D Comparison: Prediabetes vs. normoglycaemia, Outcome: stroke.**

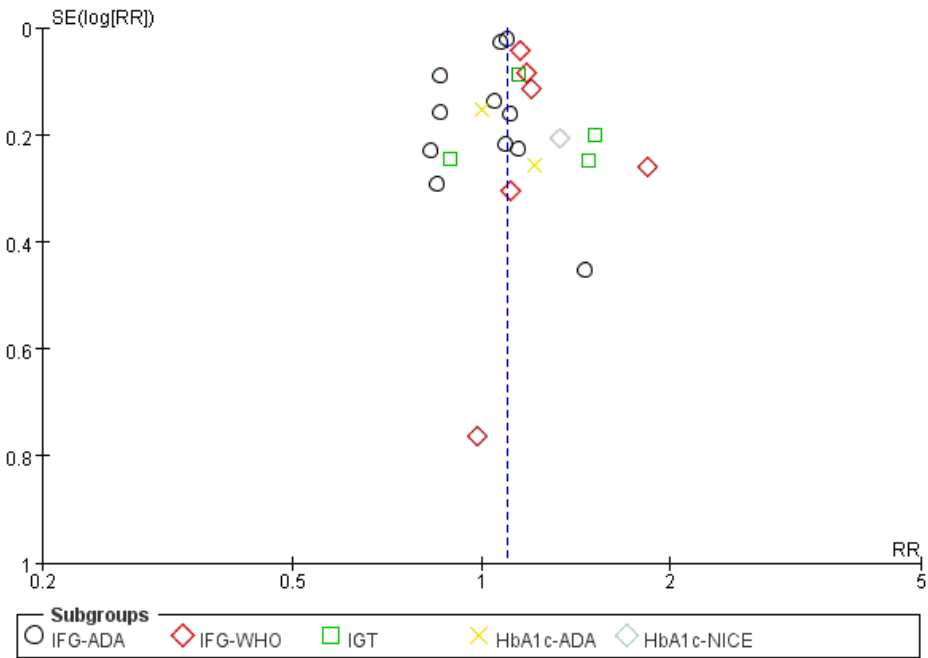

Supplement: huay034601.ww3_default.pdf [file huay034601.ww3_default.pdf]
