# Supplementary material for: Association between prediabetes and risk of cardiovascular disease and all cause mortality: systematic review and meta-analysis
Source: PubMed Central journal article supplement — BMJ. 2016 Nov 23;355:i5953. doi: 10.1136/bmj.i5953 (PMC5121106; doi:10.1136/bmj.i5953), 2016-11-23
Supplement: huay034601.ww4_default.pdf [file huay034601.ww4_default.pdf]

#### Appendix 4: Supplementary forest plots [posted as supplied by author]

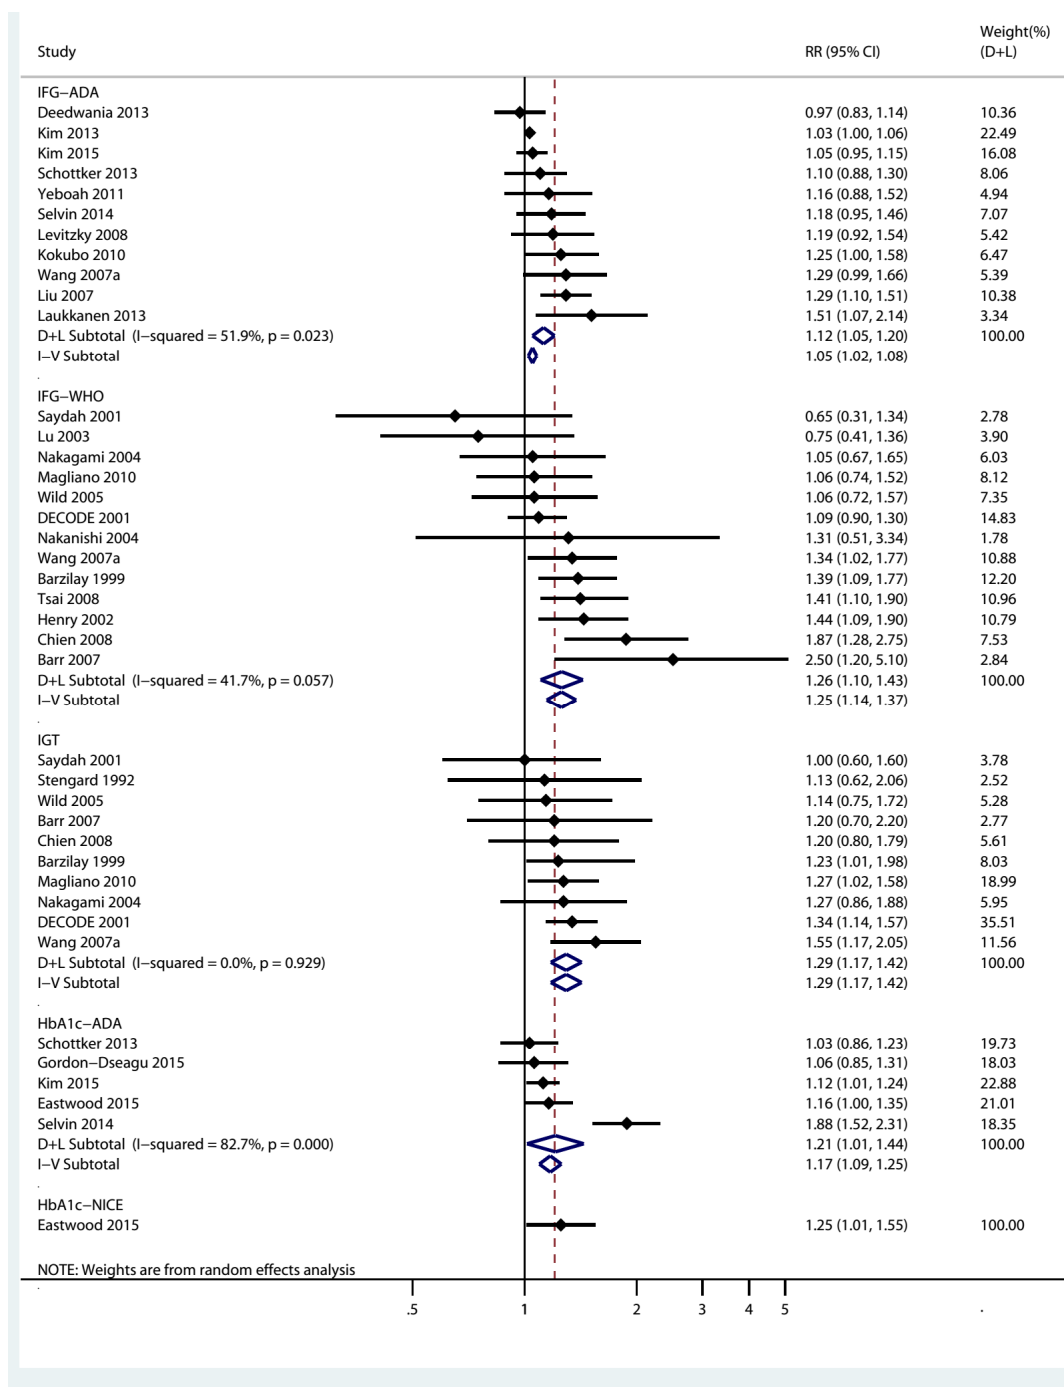

**Fig A.** Association between prediabetes and composite cardiovascular events after adjusting for smoking  
D+L =DerSimonian and Laird random-effects models; HbA1c-ADA =prediabetes defined as raised HbA1c according to the American Diabetes Association criteria (39-47 mmol/mol); HbA1c-NICE =prediabetes defined as raised HbA1c according to the NICE guidance (42-47 mmol/mol); IFG-ADA =impaired fasting glucose according to the American Diabetes Association criteria (fasting plasma glucose of 5.6-6.9 mmol/L); IFG-WHO =impaired fasting glucose according to the World Health Organization criteria (fasting plasma glucose of 6.1-6.9 mmol/L); IGT =impaired glucose tolerance; I-V = inverse variance fixed-effects models

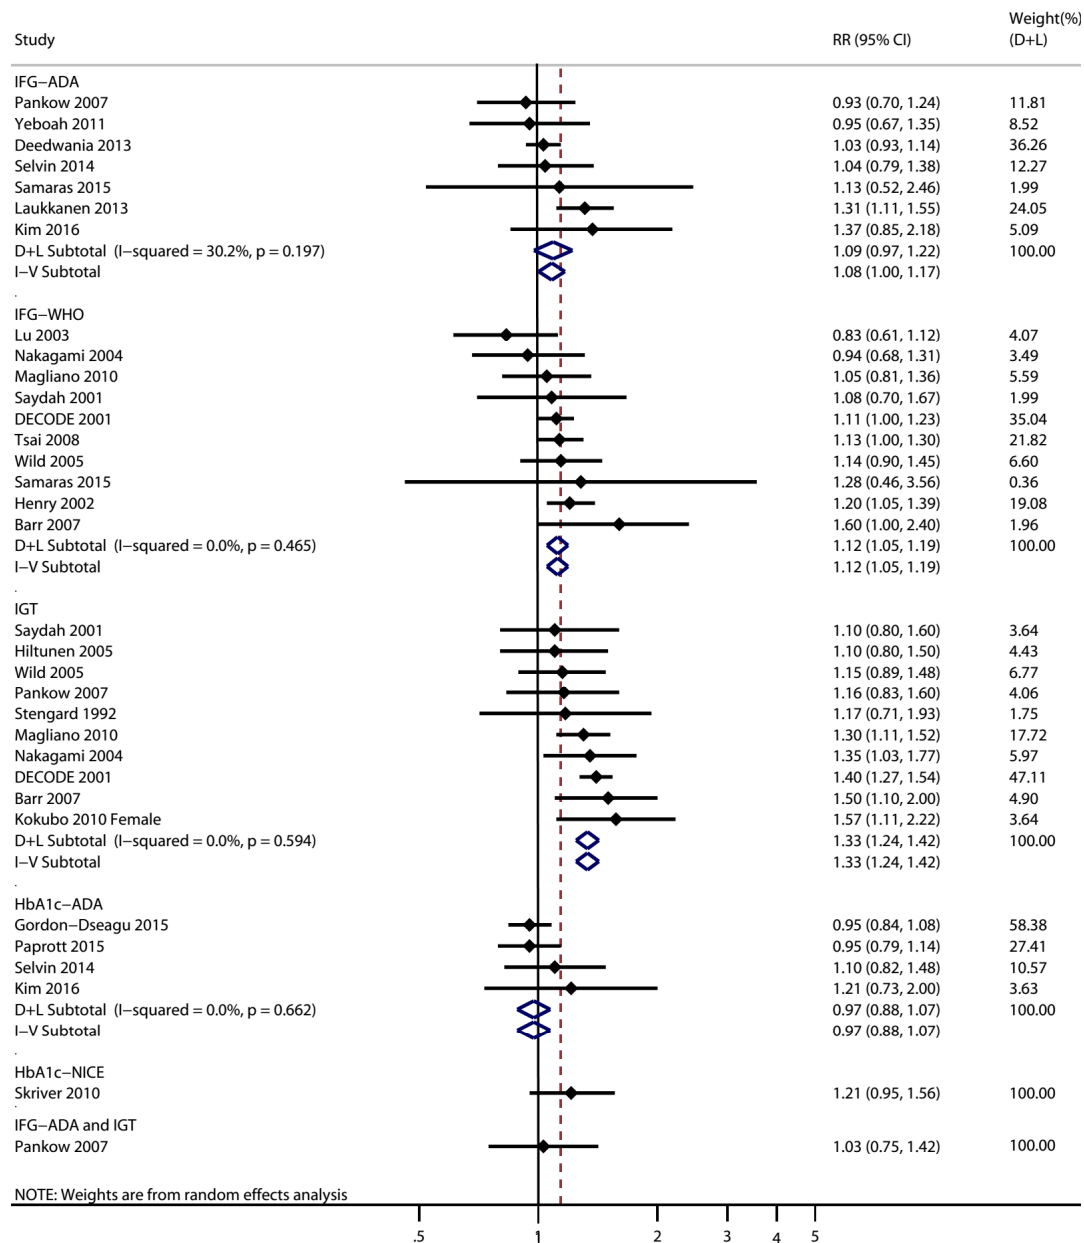

**Fig B.** Association between prediabetes and risk of all-cause mortality after adjusting for smoking  
D+L =DerSimonian and Laird random-effects models; HbA1c-ADA =prediabetes defined as raised HbA1c according to the American Diabetes Association criteria (39-47 mmol/mol); HbA1c-NICE =prediabetes defined as raised HbA1c according to the NICE guidance (42-47 mmol/mol); IFG-ADA =impaired fasting glucose according to the American Diabetes Association criteria (fasting plasma glucose of 5.6-6.9 mmol/L); IFG-WHO =impaired fasting glucose according to the World Health Organization criteria (fasting plasma glucose of 6.1-6.9 mmol/L); IGT =impaired glucose tolerance; I-V = inverse variance fixed-effects models
